# Supplementary material for: Potentially Bioactive Metabolites from Pineapple Waste Extracts and Their Antioxidant and α-Glucosidase Inhibitory Activities by 1H NMR
Source: MDPI journal article supplement (doi:10.3390/foods9020173), 2020-02-11
Supplement: s1 [file s1]

Article

# Potentially Bioactive Metabolites from Pineapple Waste Extracts and Their Antioxidant and $\alpha$ -Glucosidase Inhibitory Activities by $^1\text{H}$ NMR

Awani Azizan <sup>1</sup>, Lee Ai Xin <sup>2</sup> Nur Ashikin Abdul Hamid <sup>3</sup>, M. Maulidiani <sup>4</sup>, Siti Zulaikha Abdul Ghaffar <sup>5</sup>, Nur Khaleeda Zulaikha Zolkeflee <sup>2</sup> and Faridah Abas <sup>2,\*</sup>

1. Laboratory of Natural Products, Institute of Bioscience, Universiti Putra Malaysia, 43400 Serdang, Selangor, Malaysia; [faridah\\_abas@upm.edu.my](mailto:faridah_abas@upm.edu.my); [awani\\_azizan@yahoo.com](mailto:awani_azizan@yahoo.com); [khaleeda\\_zulaikha@yahoo.com](mailto:khaleeda_zulaikha@yahoo.com); [shikinhamid89@yahoo.com](mailto:shikinhamid89@yahoo.com)
  2. Department of Food Science, Faculty of Food Science and Technology, Universiti Putra Malaysia, 43400 Serdang, Selangor, Malaysia; [ctzue.agb@gmail.com](mailto:ctzue.agb@gmail.com); [ax1895@gmail.com](mailto:ax1895@gmail.com)
  3. School of Fundamental Science, Universiti Malaysia Terengganu, 21030 Kuala Nerus, Terengganu, Malaysia; [maulidiani@upm.edu.my](mailto:maulidiani@upm.edu.my)
- \* Correspondence: [faridah\\_abas@upm.edu.my](mailto:faridah_abas@upm.edu.my); Tel.: (+603-97698343)

Received: date; Accepted: date; Published: date

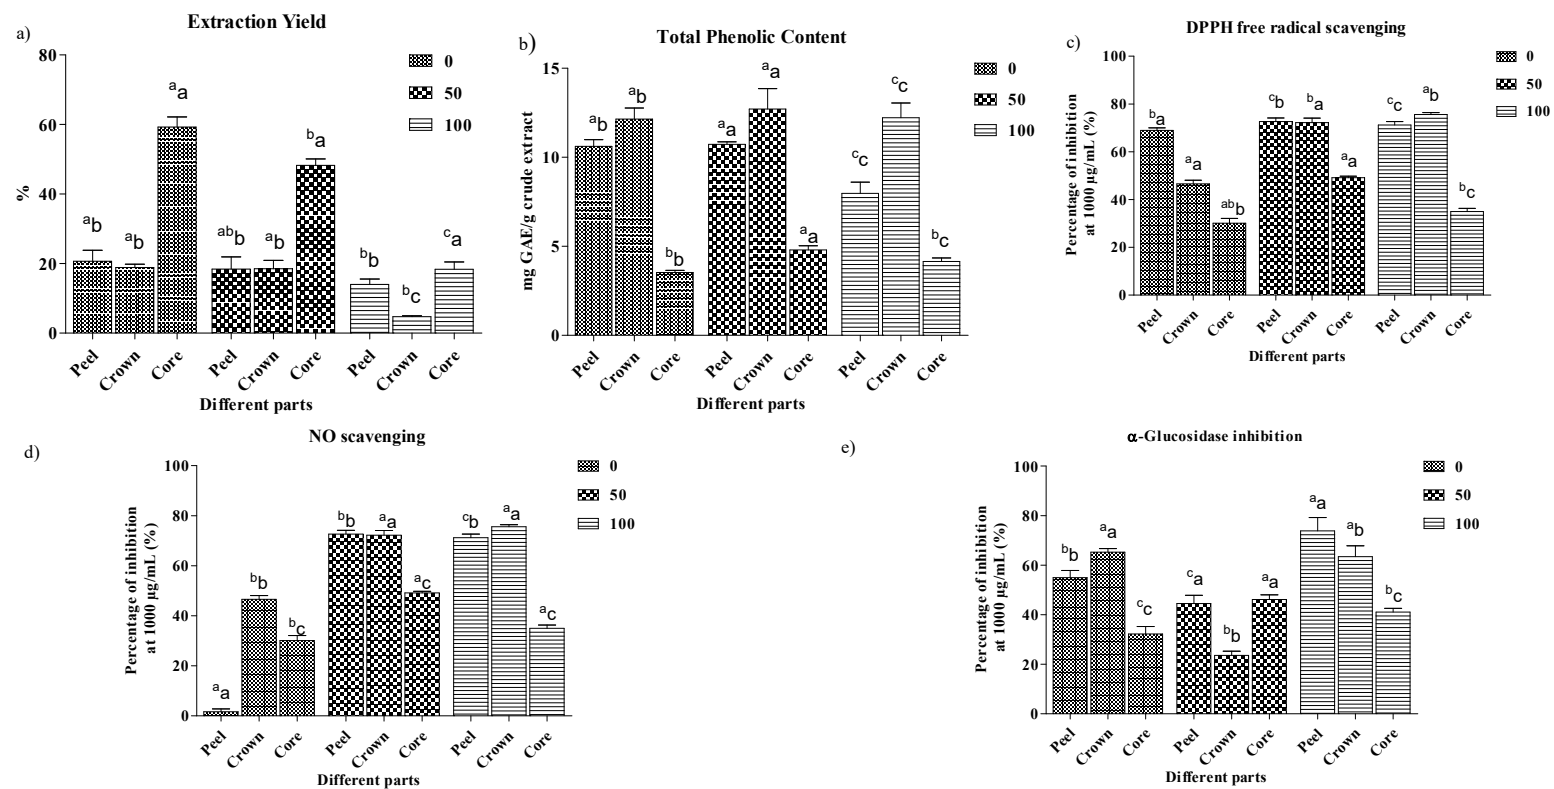

**Figure S1.** (a) Extraction yield; (b) Total phenolic content; (c) DPPH free radical scavenging; (d) NO free radical scavenging; (e)  $\alpha$ -Glucosidase inhibitory activities of MD2 pineapple peel, crown and core extracted with 0, 50 and 100% ethanol. Values are means  $\pm$  standard deviation based on four biological replicates. The superscript is to compare the same part of plant with different ethanol ratio extraction; and the subscript is to compare the different parts of the plant with same ethanol ratio extraction. Mean with different superscript and subscript letters are significantly different ( $p < 0.05$ ).

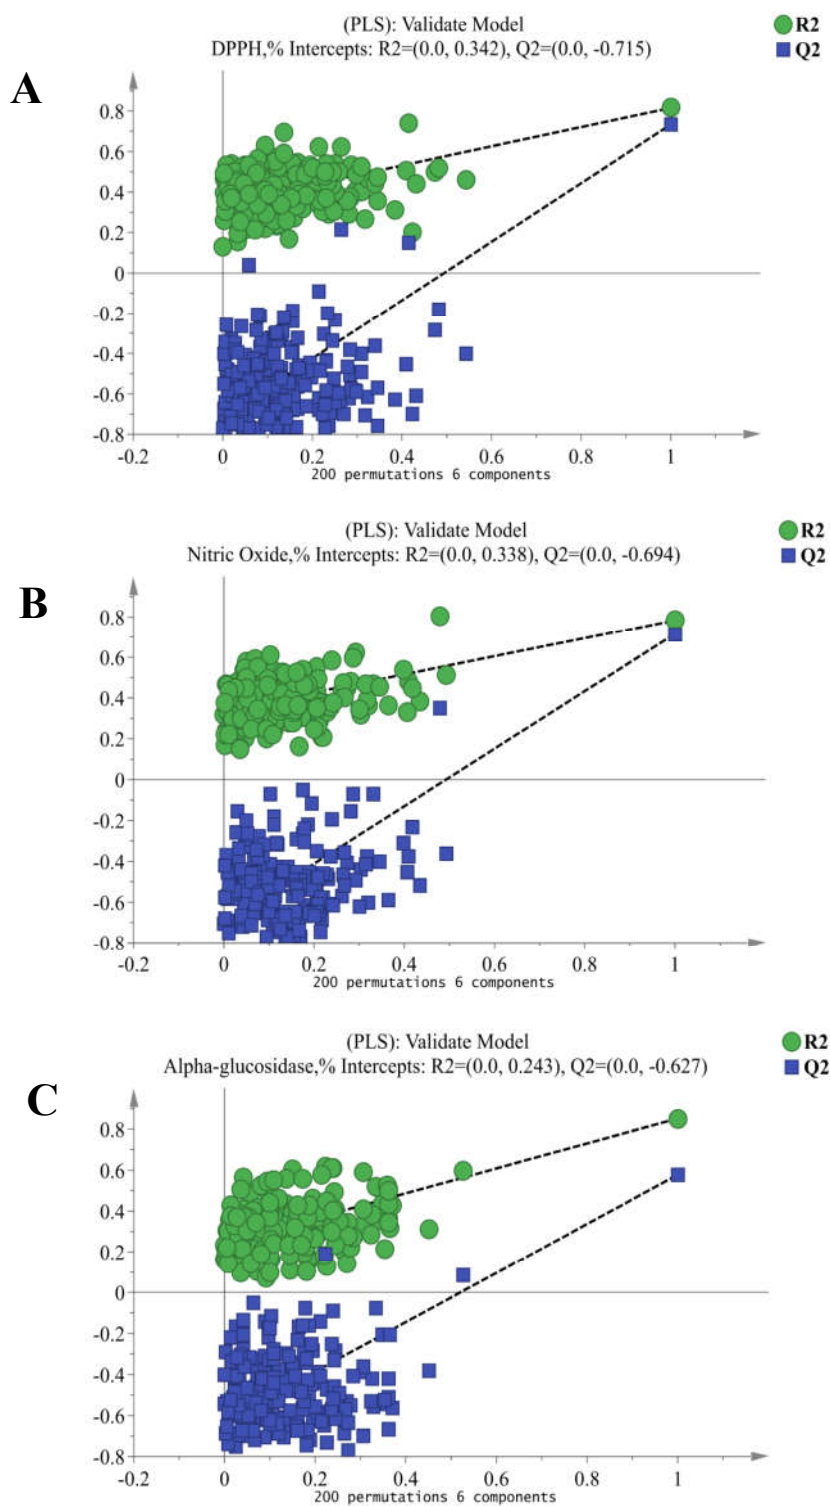

**Figure S2.** Validation of PLS model using permutation test (100 permutations) of DPPH, NO and  $\alpha$ -Glucosidase inhibitory activities.

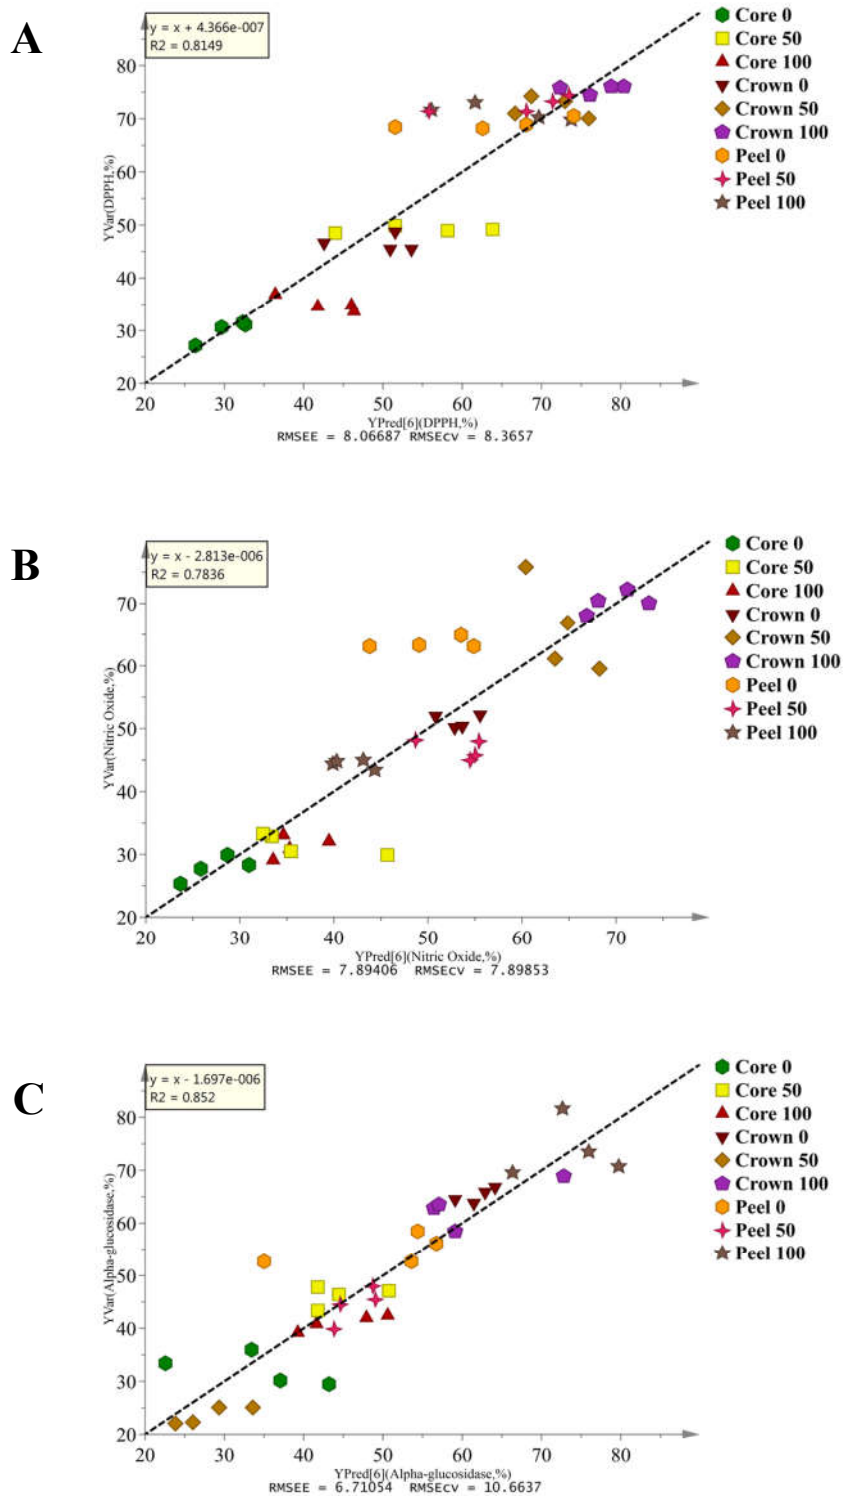

**Figure S3.** PLS derived relationship between observed vs predicted of DPPH, NO,  $\alpha$ -Glucosidase inhibitory activities.
